# Supplementary material for: Integrated analysis of Wnt signalling system component gene expression
Source: PubMed Central journal article supplement (PMC9481969; doi:10.1242/dev.200312), 2022-08-15
Supplement: develop-149-200312-s1.pdf [file develop-149-200312-s1.pdf]

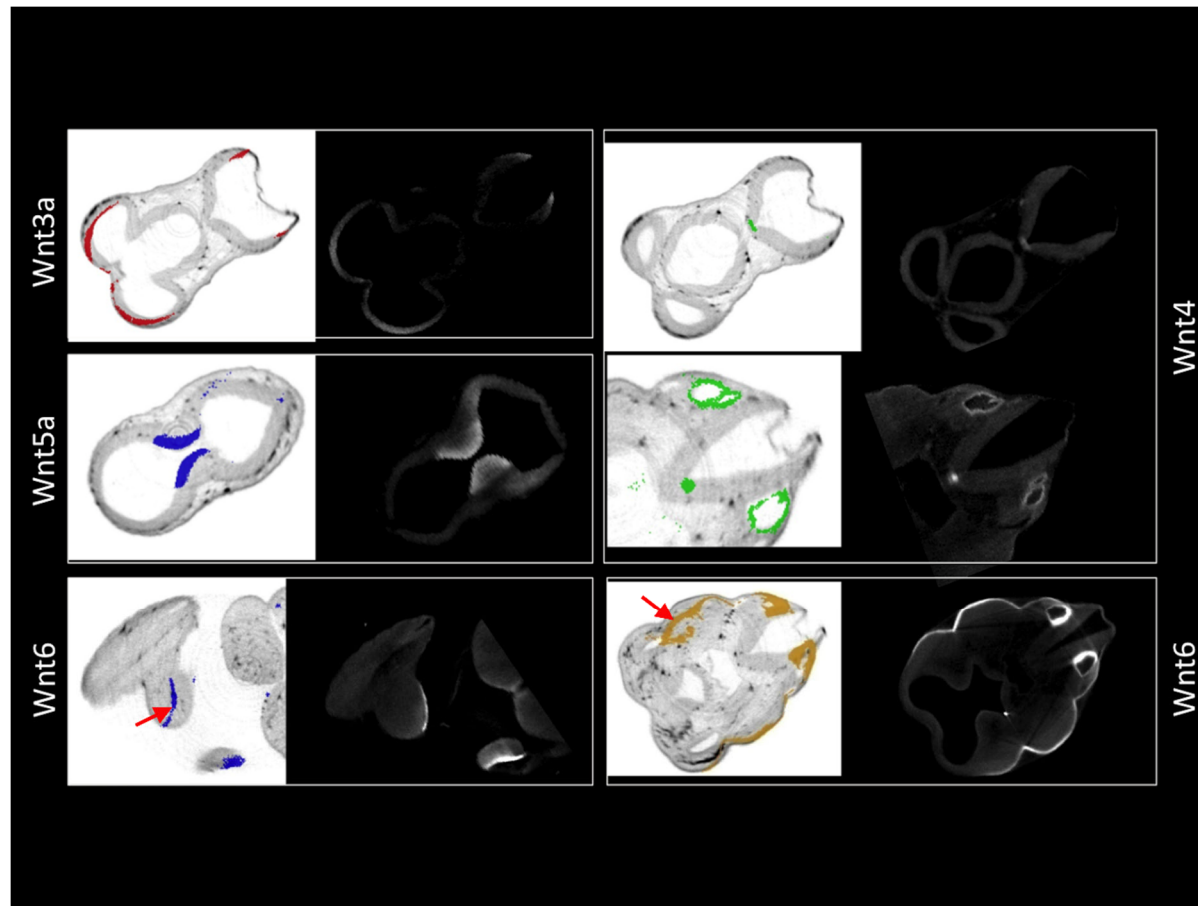

**Fig. S1. Illustration of mapping accuracy using WlzWarp.** Examples of mapped data (bright-field image on left) compared to equivalent virtual sections through 3D reconstructions of the original gene expression data (on right) for genes as indicated. All data are from E10.5 embryos through the forebrain and midbrain (Wnt3a, Wnt5a, Wnt4 (upper)), the hindbrain (Wnt4 lower), the forelimb (Wnt6 left) and hindbrain and forebrain (Wnt6 right). Note the mapping accuracy overall but the mis-mapping of ectodermal Wnt6 on one side of the embryo (arrows). Please note that mapped data are used for integrated analysis and any interpretation is supported by viewing the original scanned expression pattern. Relative scale as indicated on Figure 1.

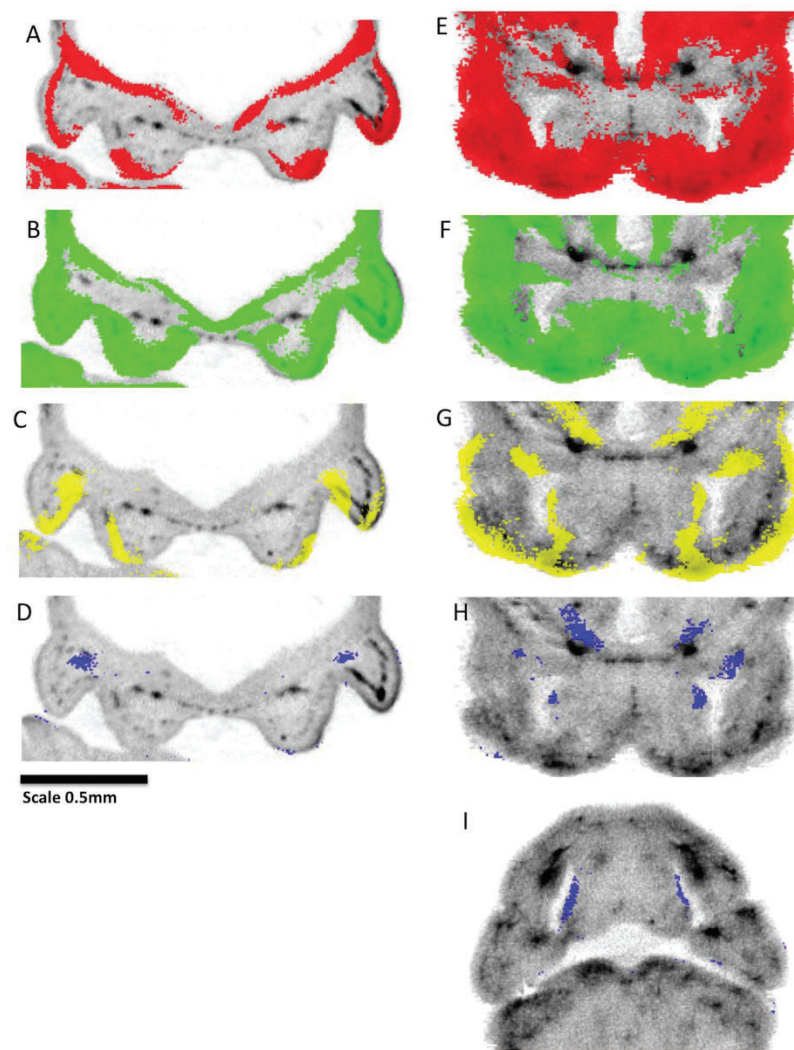

**Fig S2. Canonical Wnt pathway activity in the context of detectable Wnt and Fzd expression in the nasal region.** A-H: Frontal sections in the nasal region in OPT reference models of E10.5 (A-D) and E11.5 (E-H) embryos; I is a transverse section at E11.5. A and E, show combined expression domain for all Wnt genes; B and F, combined expression domain for all Fzd genes; C and G, Tcf/Lef-GFP; D, H and I shows the domain of Tcf/Lef-GFP activity where neither Wnt nor Fzd expression was detected.

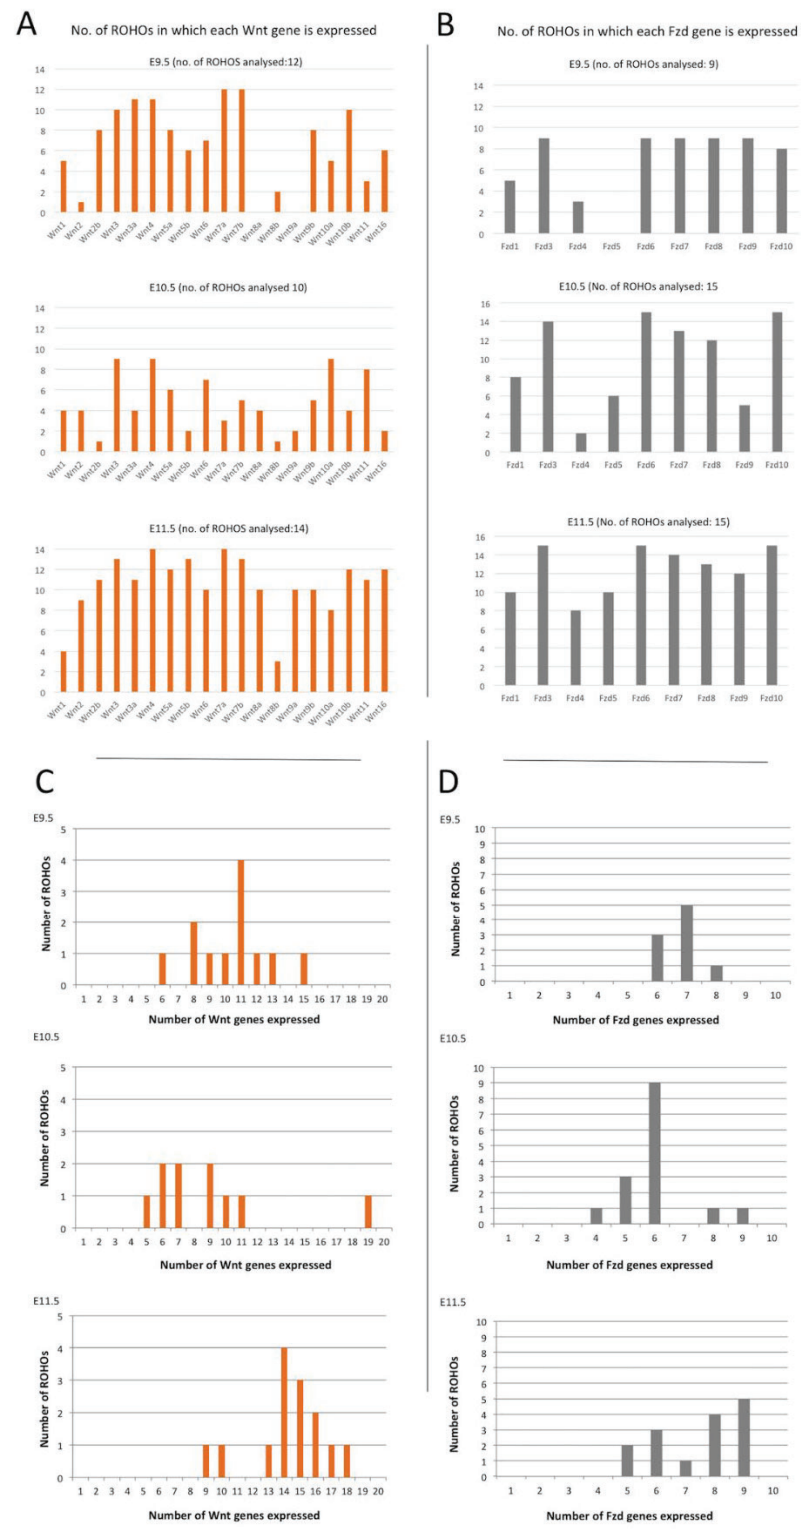

**Fig. S3. Analysis of Wnt and Fzd ROHOs.** A and B show the number of ROHOs in which each Wnt (A) and Fzd (B) gene are expressed, across stages. C and D graphically represent the number of Wnt (C) and Fzd (D) genes expressed per ROHO. Note the shift to more genes expressed per ROHO at E11.5



**Table S2.**

- (i) Proportion of the single-Wnt gene expression domain occupied by each Wnt across stages

| Wnt gene | 9.5 dpc | 10.5 dpc | 11.5 dpc |
|----------|---------|----------|----------|
| Wnt1     | 0.00684 | 0.00861  | 0.00454  |
| Wnt2b    | 0.00466 | 0.00073  | 0.08383  |
| Wnt2     | 0.07945 | 0.10506  | 0.16993  |
| Wnt3a    | 0.02398 | 0.01722  | 0.07222  |
| Wnt3     | 0.01189 | 0.06084  | 0.00597  |
| Wnt4     | 0.0538  | 0.02939  | 0.03607  |
| Wnt5a    | 0.07124 | 0.02666  | 0.11043  |
| Wnt5b    | 0.00835 | 0.00074  | 0.16437  |
| Wnt6     | 0.03493 | 0.09375  | 0.00921  |
| Wnt7a    | 0.39379 | 0.05526  | 0.07819  |
| Wnt7b    | 0.10618 | 0.09457  | 0.03283  |
| Wnt8a    | 0       | 0.0059   | 0.02262  |
| Wnt8b    | 0.00159 | 0.0053   | 0.003    |
| Wnt9a    | 0       | 0.01962  | 0.06795  |
| Wnt9b    | 0.01084 | 0.00259  | 0.02925  |
| Wnt10a   | 0.00186 | 0.02698  | 0.00243  |
| Wnt10b   | 0.1139  | 0.00136  | 0.01015  |
| Wnt11    | 0.01592 | 0.39775  | 0.02279  |
| Wnt16    | 0.06071 | 0.0476   | 0.07415  |

- (ii) Proportions of each Wnt gene expression domain (and canonical read-out) within the single Wnt expression domain (normalised by the individual Wnt expression domain volume).

| Wnt  | 9.5 dpc | 10.5 dpc | 11.5 dpc |
|------|---------|----------|----------|
| Wnt1 | 0.11466 | 0.28179  | 0.06599  |
| Wnt2 | 0.48927 | 0.54252  | 0.37266  |

|                          |         |         |         |
|--------------------------|---------|---------|---------|
| Wnt2b                    | 0.1242  | 0.07291 | 0.16949 |
| Wnt3                     | 0.11151 | 0.29977 | 0.02701 |
| Wnt3a                    | 0.10426 | 0.23143 | 0.12668 |
| Wnt4                     | 0.1944  | 0.25136 | 0.05721 |
| Wnt5a                    | 0.17406 | 0.31449 | 0.13857 |
| Wnt5b                    | 0.11239 | 0.21475 | 0.36803 |
| Wnt6                     | 0.1731  | 0.3844  | 0.0875  |
| Wnt7a                    | 0.3396  | 0.31664 | 0.13011 |
| Wnt7b                    | 0.17472 | 0.40856 | 0.05277 |
| Wnt8a                    | 0       | 0.20901 | 0.04197 |
| Wnt8b                    | 0.09059 | 0.24741 | 0.03749 |
| Wnt9a                    | 0       | 0.3669  | 0.18468 |
| Wnt9b                    | 0.13795 | 0.15841 | 0.12216 |
| Wnt10a                   | 0.11904 | 0.3306  | 0.04382 |
| Wnt10b                   | 0.25689 | 0.13489 | 0.10676 |
| Wnt11                    | 0.27627 | 0.63064 | 0.09769 |
| Wnt16                    | 0.30858 | 0.52106 | 0.11702 |
| <b>Canonical readout</b> | 0.31377 | 0.35058 | 0.18978 |

Note that the domains represented in Supplementary Table 2 were obtained by subtraction of multiple mapped expression domains and, as such, are sensitive to cumulative effects of noise in the data for each gene, in particular small differences in thresholding the original, continuously variable signals into binary (expressed versus not detected) values. The volumes should therefore be considered as approximate.

**Table S3. Genes expressed in each of the Wnt and Fzd ROHOs examined.** Right hand columns show location with Wnt ROHO in red and Fzd ROHO in green

| STRUCTURE | ROHO                         | E9.5 set                                     | E10.5 set                           | E11.5set                                                        | Location                                                                              | Wnt ROHO and Fzd ROHO                                                                 |
|-----------|------------------------------|----------------------------------------------|-------------------------------------|-----------------------------------------------------------------|---------------------------------------------------------------------------------------|---------------------------------------------------------------------------------------|
| Maxilla   | <b>W1</b>                    | 2b, 3, 3a, 4, 6, 7a, 7b, 9b, 10b             | 2, 3, 3a, 4, 5a, 6, 7b, 9b, 10a, 11 | 2, 2b, 3, 3a, 4, 5a, 5b, 6, (7a), 7b, 8a, 9a, 9b, 10b, 11, (16) | 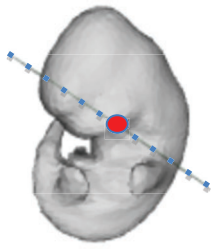   |    |
| Maxilla   | <b>F1</b>                    | 1, 3, 4, 6, 7, 8, (9), (10)                  | (1), 3, 6, 7, 8, 10                 | 1, 3, 4, 6, 7, 8, (9), 10                                       |                                                                                       | Location indicated above (in green)                                                   |
| Mandible  | <b>W2</b><br>Postero-lateral | (2b), 3, 3a, 4, 5a, 6, 7a, 7b, 9b, 10b, (16) | NO ROHO                             | 2, 2b, 3, 3a, 4, 5a, 5b, 6, 7a, 7b, 8a, 9b, 10a, 10b, 11, 16    |  |  |
| Mandible  | <b>F2</b><br>Postero-lateral | (1), 3, 6, 7, 8, 9, 10                       | (1), 3, 6, 7, 8, 10                 | 3, 4, 6, 7, (9), 10                                             |                                                                                       | Location indicated above (in green)                                                   |
| Mandible  | <b>W3</b><br>Antero-medial   | 2b, (3), 3a, 4, 5a, 6, 7a, 7b, 9b, 10b       | 3, 4, 5a, 6, 7b, 8a, 9b, 10a, 11    | NO ROHO                                                         |  |  |

|           |                                        |                                                                   |                                   |                                                                  |                                                                                       |                                                                                       |
|-----------|----------------------------------------|-------------------------------------------------------------------|-----------------------------------|------------------------------------------------------------------|---------------------------------------------------------------------------------------|---------------------------------------------------------------------------------------|
| Mandible  | <b>F3</b><br>Antero-medial             | 3, 4, 6, 7, 8, 9, 10                                              | 1, 3, 6, 10                       | NO ROHO                                                          |                                                                                       | Location indicated above (in green)                                                   |
| Arch 2    | <b>W4</b>                              | (2b), 3, 3a, 4, 5a, (5b), 7a, 7b, 9b, 10b, (16)                   | NO ROHO                           | NO ROHO                                                          | 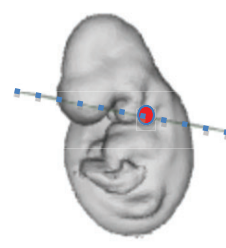   |    |
| Arch 2    | <b>F4</b>                              | (1), 3, 6, 7, 8, 9, 10                                            | 3, 4, 6, 7, 8, 10                 | 1, 3, 4, (5), 6, 7, (8), (9), 10                                 |                                                                                       | Location indicated above (in green)                                                   |
| Neck      | <b>W5</b>                              | No ROHO                                                           | 2, 3, (4), 5a, 6, 7a, 9b, 10a, 11 | 2, 2b, 3, 3a, 4, 5a, 5b, 6, 7a, 7b, 8a, 9a, 9b, 10a, 10b, 11, 16 |   |   |
| Neck      | <b>F5</b>                              | (1), 3, 4, (6), 7, 8, 9,                                          | 1, 3, (5), 6, 7, 8, (9), (10)     | 1, 3, 4, 5, 6, 7, 8, 9, 10                                       |                                                                                       | Location indicated above (in green)                                                   |
| Fore Limb | <b>W6</b><br>Early distal<br>E9.5 only | (2b), 3, 3a, 4, 5a, (5b), 6, 7a, 7b, (8b), 9b, 10a, 10b, 11, (16) |                                   |                                                                  |  |  |
| Fore Limb | <b>F6</b><br>Early distal<br>E9.5 only | 1, 3, 6, 7, 8, (9), 10                                            |                                   |                                                                  |                                                                                       | Location indicated above (in green)                                                   |



|           |                              |         |                                                 |                                                                  |                                                                                       |                                                                                       |
|-----------|------------------------------|---------|-------------------------------------------------|------------------------------------------------------------------|---------------------------------------------------------------------------------------|---------------------------------------------------------------------------------------|
| Fore Limb | <b>W7</b><br>Distal          | N/A     | 5a, 6, 7a, 10a, 10b, 11                         | NO ROHO                                                          |    |    |
| Forelimb  | <b>F7</b><br>Distal          | N/A     | continuous with ROHO F10 (5), 6, 7, 8, 9, 10    | NO ROHO                                                          |                                                                                       | Location indicated above (in green)                                                   |
| Forelimb  | <b>W8</b><br>Proximo-ventral | No ROHO | <b>2, 3, 4, 6, 7b, 8a, 9a, 9b, 10a, 10b, 11</b> | <b>2, 3, 3a, 4, 5a, 5b, 6, 7a, 7b, 8a, 9a, 9b, 10b, 11, (16)</b> |   |   |
| Forelimb  | <b>F8</b><br>Proximo-ventral | NO ROHO | <b>1, 3, 6, 7, 10</b>                           | <b>1, 3, 5, 6, 7, 8, 10</b>                                      |                                                                                       | Location indicated above (in green)                                                   |
| Forelimb  | <b>W9</b><br>Proximo-dorsal  | NO ROHO | 3, 4, 6, 10a, 10b, 11, 16                       | NO ROHO                                                          |  |  |
| Forelimb  | <b>F9</b><br>Proximo-dorsal  | NO ROHO | <b>1, 3, 6, 7, 8, 10</b>                        | <b>1, (3), 4, (5), 6, 7, 8, 10</b>                               |                                                                                       | Location indicated above (in green)                                                   |

|          |                                         |                                                                                          |                            |                                                                                     |                                                                                       |                                                                                       |
|----------|-----------------------------------------|------------------------------------------------------------------------------------------|----------------------------|-------------------------------------------------------------------------------------|---------------------------------------------------------------------------------------|---------------------------------------------------------------------------------------|
| Forelimb | <b>W10</b><br>Dorsal surface            | NO ROHO                                                                                  | NO ROHO                    | 2, 2b, 3a, 4, 5a, 5b, 6, 7a, (7b), 8a, (9b), 10a, 10b, 11                           | 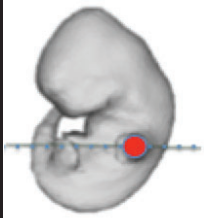   |    |
| Forelimb | <b>F10</b><br>Dorsal surface            | NO ROHO                                                                                  | <b>3, 6, 7, 8, (9), 10</b> | <b>1, (3), 4, 5, 6, 7, 8, 9, 10</b>                                                 |                                                                                       | Location indicated above (in green)                                                   |
| Flank    | <b>F11</b><br>Flank dorsal to fore limb | NO ROHO                                                                                  | <b>1, 3, 6, 7, 8, 10</b>   | <b>1, (3), (5), 6, 7, 8, (9), 10</b>                                                |   |   |
| Flank    | <b>W12</b><br>Mid Flank                 | <b>2, (2b), 3, (3a), 4, 5a, 6, 7a, 7b, 9b, (10a), 10b, 11</b><br>Small but distinct ROHO | NO ROHO                    | <b>2, 2b, (3), 3a, 4, 5a, 5b, 6, 7a, (7b), 8a, (8b), 9a, 9b, (10a), 10b, 11, 16</b> |  |  |
| Flank    | <b>F12</b><br>Mid Flank                 | NO ROHO                                                                                  | <b>3, 6, 7, 8, 10</b>      | <b>1, 3, (4), 5, 6, 7, 8, 9, 10</b>                                                 |                                                                                       | Location indicated above (in green)                                                   |

|              |                            |                                                  |         |                                                                |                                                                                       |                                                                                       |
|--------------|----------------------------|--------------------------------------------------|---------|----------------------------------------------------------------|---------------------------------------------------------------------------------------|---------------------------------------------------------------------------------------|
| Ventral tail | <b>W13</b>                 | <b>2b, 3, 3a, 4, 5a, 5b, (6), 7a, 7b, 11, 16</b> | NO ROHO | <b>2, (2b), 3, 3a, 4, 5a, 5b, 6, 7a, 7b, 9a, 9b, (10b), 16</b> | 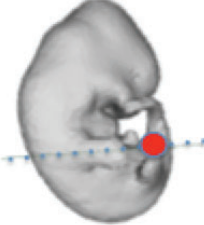   |    |
| Ventral tail | <b>F13</b>                 | NO ROHO                                          | NO ROHO | 3, 6, 7, 9, 10                                                 |                                                                                       | Location indicated above (in green)                                                   |
| Heart        | <b>W14</b><br>Right atrium | NO ROHO                                          | NO ROHO | 1, 2 2b, 3, 4, 5a, 5b, 6, 7a, 7b, 9a, 9b, 10a, 10b, 11, 16.    |   |   |
| Heart        | <b>W15</b><br>Left atrium  | NO ROHO                                          | NO ROHO | 2, 3, 4, 5a, 5b, 6, 7a, 7b, 8a, 9a, 10a, 10b, 11, 16           |  |  |

|              |            |                                                |                                                                            |                                                            |                                                                                       |                                                                                       |
|--------------|------------|------------------------------------------------|----------------------------------------------------------------------------|------------------------------------------------------------|---------------------------------------------------------------------------------------|---------------------------------------------------------------------------------------|
| Cortical hem | <b>W16</b> | (1), 3a, 4, 5b, 7a, 7b, 8b, 9b, 10a 10b, (16)  | NO ROHO                                                                    | 3,3a, 4,5a,5b,7a,7b,8a,8b,9a, 9b, 11,16                    | 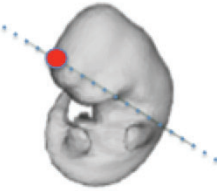   |    |
| Cortical hem | <b>F16</b> | NO ROHO                                        | NO ROHO                                                                    | 3, 5, 6, 8, 9, 10                                          |                                                                                       | Location indicated above (in green)                                                   |
| Isthmus      | <b>W17</b> | 1, 5a, 5b, 7a, 7b, 10b                         | 1, 3, (3a), 4, 5a, 5b, 7b                                                  | 1, 2b, 3, 4, 5a, 5b, 7a, 7b, 8a, 8b, 9a, 9b, (10b), 11, 16 |   |   |
| Isthmus      | <b>F17</b> | NO ROHO                                        | 3, (5), 6, 7, 9, 10,                                                       | 1, 3, 5, 6, 7, 8, 9, (10)                                  |                                                                                       | Location indicated above (in green)                                                   |
| Midbrian     | <b>W18</b> | 1, 2b, 3, 3a, 4, (5a), 5b, 6, 7a, 7b, 10a, 10b | 1, (2), 2b, 3, 3a, 4, 5a, 5b, 6, 7a, 7b, 8a, 8b, 9a, 9b, 10a, 10b, 11, 16, | 1, 2b, 3, 3a, 4, 5a, 5b 6, 7a, 9a, 10a, 10b (11), 16       |  |  |
| Midbrian     | <b>F18</b> | 3, 6, 7, 8, 9, 10                              | 1, 3, 4, 5, 6, 7, 8, 9, 10                                                 | 1, 3, 4, 5, 6, 7, 8, 9, 10                                 |                                                                                       | Location indicated above (in green)                                                   |

|                     |            |                                                          |                             |                                              |                                                                                       |                                                                                       |
|---------------------|------------|----------------------------------------------------------|-----------------------------|----------------------------------------------|---------------------------------------------------------------------------------------|---------------------------------------------------------------------------------------|
| Dorsal anterior NT  | <b>W19</b> | <b>1, 3, 3a, 4, 7a, 7b, 10b, 16</b>                      | <b>1, 3, 4, (8a), 10a</b>   | <b>1, 2b, 3, 3a, 4, 7a, 7b, 8a, 10a, 16,</b> | 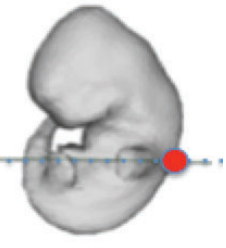   |    |
| Dorsal anterior NT  | <b>F19</b> | <b>3, 6, 7, 8, (9), 10</b>                               | <b>3, (5), 6, 8, 10</b>     | NO ROHO                                      |                                                                                       | Location indicated above (in green)                                                   |
| Mid-d-v anterior NT | <b>F20</b> | NO ROHO                                                  | NO ROHO                     | 3, 6, 7, 8, 10                               |   |   |
| Dorsal trunk NT     | <b>W21</b> | v. small ROHO<br><b>1, (3), 3a, 4, 7a, 7b, 9b, (10a)</b> | <b>1, 3, 3a, 4, 10a, 11</b> | <b>1, 2b, 3, 3a, 4, (5b), 7a, 7b, 10b</b>    |  |  |
| Dorsal trunk NT     | <b>F21</b> | <b>3, (6), 7, 8, (9), 10</b>                             | <b>3, (5), 6, 7, 8, 10</b>  | NO ROHO                                      |                                                                                       | Location indicated above (in green)                                                   |

|                                       |            |         |         |                   |                                                                                     |                                                                                     |
|---------------------------------------|------------|---------|---------|-------------------|-------------------------------------------------------------------------------------|-------------------------------------------------------------------------------------|
| Mid-ventral<br>alar plate<br>trunk NT | <b>F22</b> | NO ROHO | NO ROHO | 3, 6, 7, 8, 9, 10 | 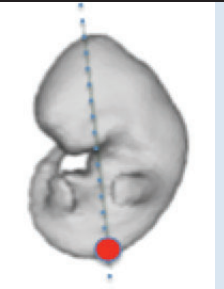 |  |
|---------------------------------------|------------|---------|---------|-------------------|-------------------------------------------------------------------------------------|-------------------------------------------------------------------------------------|

In the Table above, the Wnt and Fzd ROHOs are numbered W1, W2, etc., F1, F2, etc. respectively. The location of each ROHO is illustrated at the latest stage the ROHO is present. **Bold** gene numbers indicate genes expressed in the ROHO at all stages when this ROHO is present. Gene numbers in parenthesis indicate that the expression domain or intersection with the ROHO is small, comprising only a few voxels. Note the number of genes listed can exceed the maximum occupancy for that ROHO because some genes intersect only part of the ROHO.



**Table S5.** details of gene expression probes and EMAGE entry IDs

\*Note no specific expression detected for Fzd2 and Sfrp5 at these stages

| Gene             | Extent of Probe on Genbank Sequence                                      | Source                 | EMAGE IDs                                                                                     |
|------------------|--------------------------------------------------------------------------|------------------------|-----------------------------------------------------------------------------------------------|
| Wnt1             | Nucleotide 138 to 2345 on genbank sequence BC005449.1                    | A. McMahon             | <a href="#">EMAGE:6131</a><br><a href="#">EMAGE:6132</a><br><a href="#">EMAGE:3949</a>        |
| Wnt2             | Nucleotide 19 to 1493 on genbank sequence BC026373                       | A. McMahon             | <a href="#">EMAGE:6133</a><br><a href="#">EMAGE:6134</a><br><a href="#">EMAGE:3950</a>        |
| Wnt2b            | Nucleotide 882 to 1103 on genbank sequence AF070988                      | L. Zakin               | <a href="#">EMAGE:6135</a><br><a href="#">EMAGE:6136</a><br><a href="#">EMAGE:3951</a>        |
| Wnt3             | Nucleotide 1610 to 2973 on genbank sequence NM_009521.1                  | P. Salinas             | <a href="#">EMAGE:6137</a><br><a href="#">EMAGE:6138</a><br><a href="#">EMAGE:3952</a>        |
| Wnt3a            | Nucleotide 2310 to 2676 on genbank sequence NM_009522.1                  | RT-PCR generated       | <a href="#">EMAGE:6139</a><br><a href="#">EMAGE:6141</a><br><a href="#">EMAGE:3953</a>        |
| Wnt4             | Nucleotide 853 to 1315 on genbank sequence AK012727                      | A. McMahon             | <a href="#">EMAGE:6140</a><br><a href="#">EMAGE:6142</a><br><a href="#">EMAGE:3954</a>        |
| Wnt5a            | Nucleotide 193 to 2324 on genbank sequence BC018425                      | A. McMahon             | <a href="#">EMAGE:6143</a><br><a href="#">EMAGE:6144</a><br><a href="#">EMAGE:3955</a>        |
| Wnt5b            | Nucleotide 111 to 1429 on genbank sequence BC010775                      | A. McMahon             | <a href="#">EMAGE:6145</a><br><a href="#">EMAGE:6146</a><br><a href="#">EMAGE:3956</a>        |
| Wnt6             | Nucleotide 27 to 2066 on genbank sequence NM_009526.3                    | A. McMahon             | <a href="#">EMAGE:6147</a><br><a href="#">EMAGE:6148</a><br><a href="#">EMAGE:3957</a>        |
| Wnt7a            | Nucleotide 24 to 3164 on genbank sequence BC049093                       | A. McMahon             | <a href="#">EMAGE:6149</a><br><a href="#">EMAGE:6150</a><br><a href="#">EMAGE:3958</a>        |
| Wnt7b            | Nucleotide 93 to 1581 on genbank sequence NM_009528.2                    | A. McMahon             | <a href="#">EMAGE:6151</a><br><a href="#">EMAGE:6152</a><br><a href="#">EMAGE:3959</a>        |
| Wnt8a            | Nucleotide 87 to 1746 on genbank sequence NM_009290.1                    | P. Chambon             | <a href="#">EMAGE:6153</a><br><a href="#">EMAGE:3960</a>                                      |
| Wnt8b            | Nucleotide 942 to 1631 on genbank sequence NM_011720.2                   | J. Mason               | <a href="#">EMAGE:6166</a><br><a href="#">EMAGE:6154</a><br><a href="#">EMAGE:3961</a>        |
| Wnt9a            | Nucleotide 1698 to 2247 on genbank sequence NM_139298.2                  | RT-PCR generated       | <a href="#">EMAGE:6155</a><br><a href="#">EMAGE:6156</a><br><a href="#">EMAGE:3962</a>        |
| Wnt9b            | Nucleotide 2834 to 3436 on genbank sequence NM_011719.3                  | RT-PCR generated       | <a href="#">EMAGE:6158</a><br><a href="#">EMAGE:6157</a><br><a href="#">EMAGE:3963</a>        |
| Wnt10a           | Nucleotide 289 to 2469 on genbank sequence NM_009518.1                   | IMAGE clone            | <a href="#">EMAGE:6159</a><br><a href="#">EMAGE:6160</a><br><a href="#">EMAGE:3964</a>        |
| Wnt10b           | Nucleotide 27 to 473 on genbank sequence U61970                          | A. McMahon             | <a href="#">EMAGE:6167</a><br><a href="#">EMAGE:6161</a><br><a href="#">EMAGE:3965</a>        |
| Wnt11            | Nucleotide 169 to 1789 on genbank sequence NM_009519.1 + 419bp of 3' UTR | A. McMahon             | <a href="#">EMAGE:6162</a><br><a href="#">EMAGE:6163</a><br><a href="#">EMAGE:3966</a>        |
| Wnt16            | Nucleotide 538 to 1532 on genbank sequence NM_053116                     | PCR cloned             | <a href="#">EMAGE:6164</a><br><a href="#">EMAGE:6165</a><br><a href="#">EMAGE:3967</a>        |
| Fzd1             | Nucleotide 2774 to 3663 on genbank sequence NM_021457.2                  | PCR cloned             | <a href="#">EMAGE:6129</a><br><a href="#">EMAGE:6130</a><br><a href="#">EMAGE:3939</a>        |
| Fzd2*            | Nucleotide 3106 to 3441 on genbank sequence BC049774                     | IMAGE clone            | Not detected                                                                                  |
| Fzd3             | Nucleotide 127 to 1485 on genbank sequence BC050965                      | U. Borello/C. Cossu    | <a href="#">EMAGE:6101</a><br><a href="#">EMAGE:6115</a><br><a href="#">EMAGE:3941</a>        |
| Fzd4             | Nucleotide 1419 to 1862 on genbank sequence BC015256                     | U. Borello/C. Cossu    | <a href="#">EMAGE:6116</a><br><a href="#">EMAGE:6117</a><br><a href="#">EMAGE:3942</a>        |
| Fzd5             | Nucleotide 640 to 868 on genbank sequence AB052910                       | U. Borello/C. Cossu    | <a href="#">EMAGE:6118</a><br><a href="#">EMAGE:6119</a><br><a href="#">EMAGE:3943</a>        |
| Fzd6             | Nucleotide 1794 to 2642 on genbank sequence NM_008056.2                  | U. Borello/C. Cossu    | <a href="#">EMAGE:6120</a><br><a href="#">EMAGE:6121</a><br><a href="#">EMAGE:3944</a>        |
| Fzd7             | Nucleotide 191 to 1013 on genbank sequence BC049781                      | U. Borello/C. Cossu    | <a href="#">EMAGE:6122</a><br><a href="#">EMAGE:6123</a><br><a href="#">EMAGE:3945</a>        |
| Fzd8             | Nucleotide 968 to 1965 on genbank sequence NM_008058.1                   | U. Borello/C. Cossu    | <a href="#">EMAGE:6124</a><br><a href="#">EMAGE:6125</a><br><a href="#">EMAGE:3946</a>        |
| Fzd9             | Nucleotide 678 to 1178 on genbank sequence AF033585                      | U. Borello/C. Cossu    | <a href="#">EMAGE:6126</a><br><a href="#">EMAGE:3947</a>                                      |
| Fzd10            | Nucleotide 1892 to 2988 on genbank sequence NM_175284.3                  | IMAGE library          | <a href="#">EMAGE:6127</a><br><a href="#">EMAGE:6128</a><br><a href="#">EMAGE:3948</a>        |
| Lef1             | Nucleotide 371 on NM_010703.3                                            | J. Meeldijk            | <a href="#">EMAGE:5753 (TS16)</a><br><a href="#">EMAGE:5757</a><br><a href="#">EMAGE:5758</a> |
| Tcf7             | Nucleotide 18 to 1572 on NM_009331.3                                     | R.Grosschedl           | <a href="#">EMAGE:5765</a><br><a href="#">EMAGE:5759</a><br><a href="#">EMAGE:5760</a>        |
| Tcf7I1           | Nucleotide 86 to 1582 on NM_009332.2                                     | Cloned: library screen | <a href="#">EMAGE:5766</a><br><a href="#">EMAGE:5761</a><br><a href="#">EMAGE:5762</a>        |
| Tcf7I2           | Nucleotide 946 to 1361 on NM_009333.3                                    | J.Rubenstein           | <a href="#">EMAGE:5754 (TS16)</a><br><a href="#">EMAGE:5763</a><br><a href="#">EMAGE:5764</a> |
| $\beta$ -catenin | Nucleotide 2194 to 2621 on NM_007614.2                                   | U.Borello/ G. Cossu    | <a href="#">EMAGE 5752</a><br><a href="#">EMAGE 5755</a><br><a href="#">EMAGE 5756</a>        |
| Sfrp1            | Nucleotide 12 to 784 on NM_013834                                        | A Rattner              | Not on EMAGE                                                                                  |
| Sfrp2            | Nucleotide 82 to 852 on U88569                                           | A Rattner              | "                                                                                             |
| Sfrp3            | Nucleotide 2059-2522 on NM_011356.4                                      | PCR cloned             | "                                                                                             |
| Sfrp4            | Nucleotide 9 to 1756 on NM_016687.3                                      | A Rattner              | "                                                                                             |
| Sfrp5*           | Nucleotide 1 to 1081 on NM_018780.3                                      | PCR cloned             | Not detected                                                                                  |
| Wif1             | Nucleotide 876 to 2237 on NM_011915.2                                    | IMAGE library          | Not on EMAGE                                                                                  |
| Wise             | Nucleotide 81 to 1038 on NM_025312.3                                     | IMAGE library          | "                                                                                             |
| Ror2             | Nucleotide 1 to 3968 on NM_013846.3                                      | IMAGE library          | "                                                                                             |



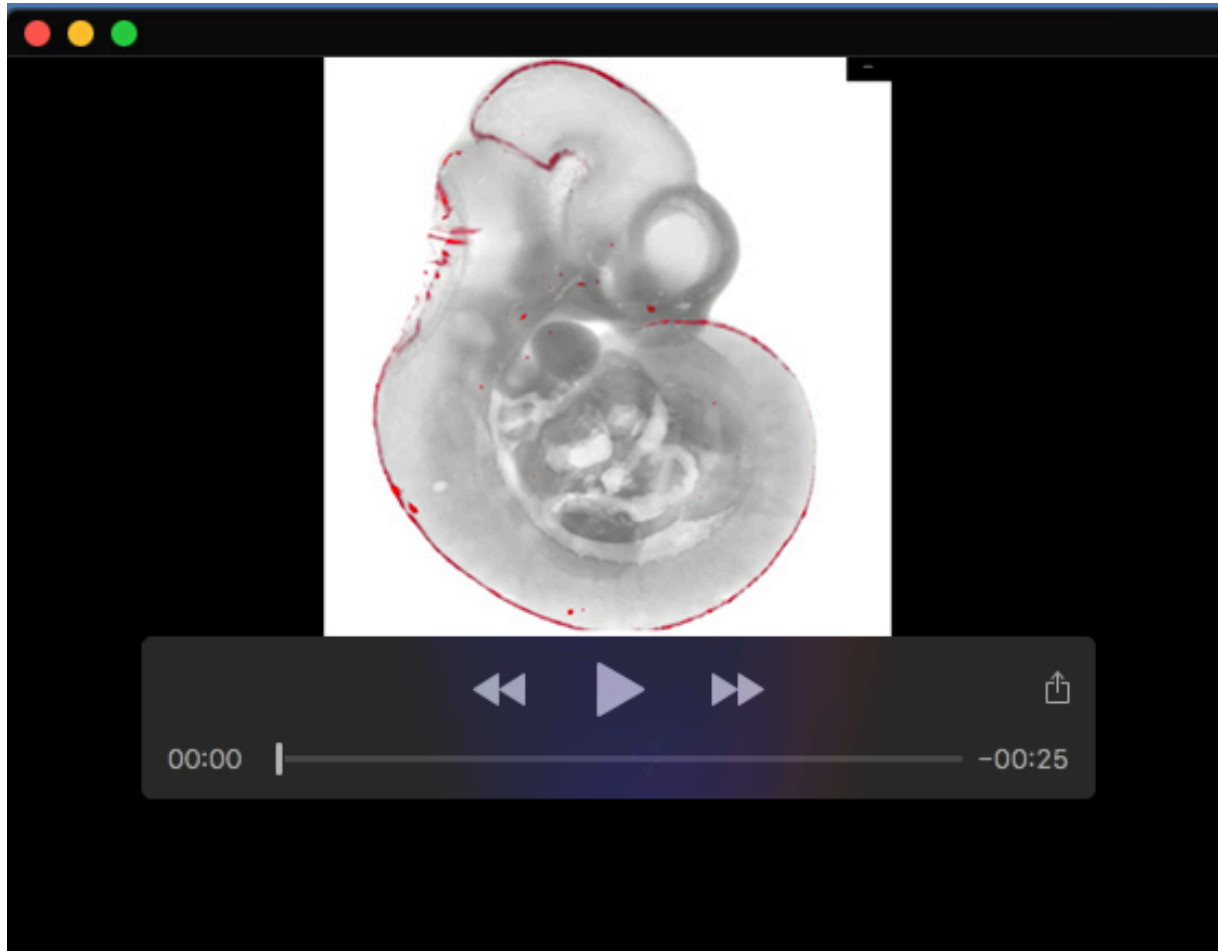

**Movie 1.** 3D movie of Wnt1 expression pattern at E10.5 mapped onto reference embryo

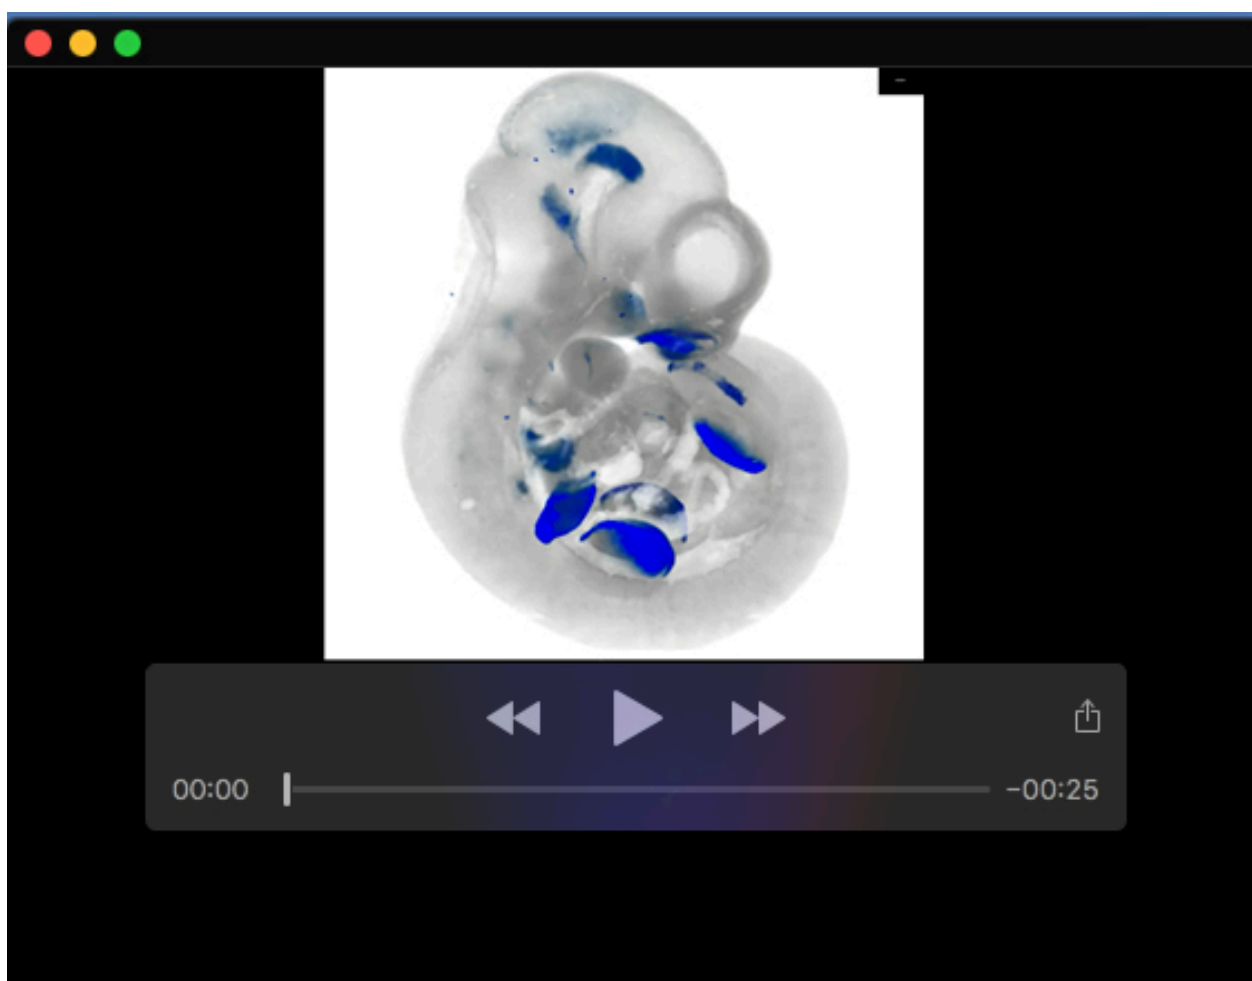

**Movie 2.** 3D movie of Wnt5a expression pattern at E10.5 mapped onto reference embryo

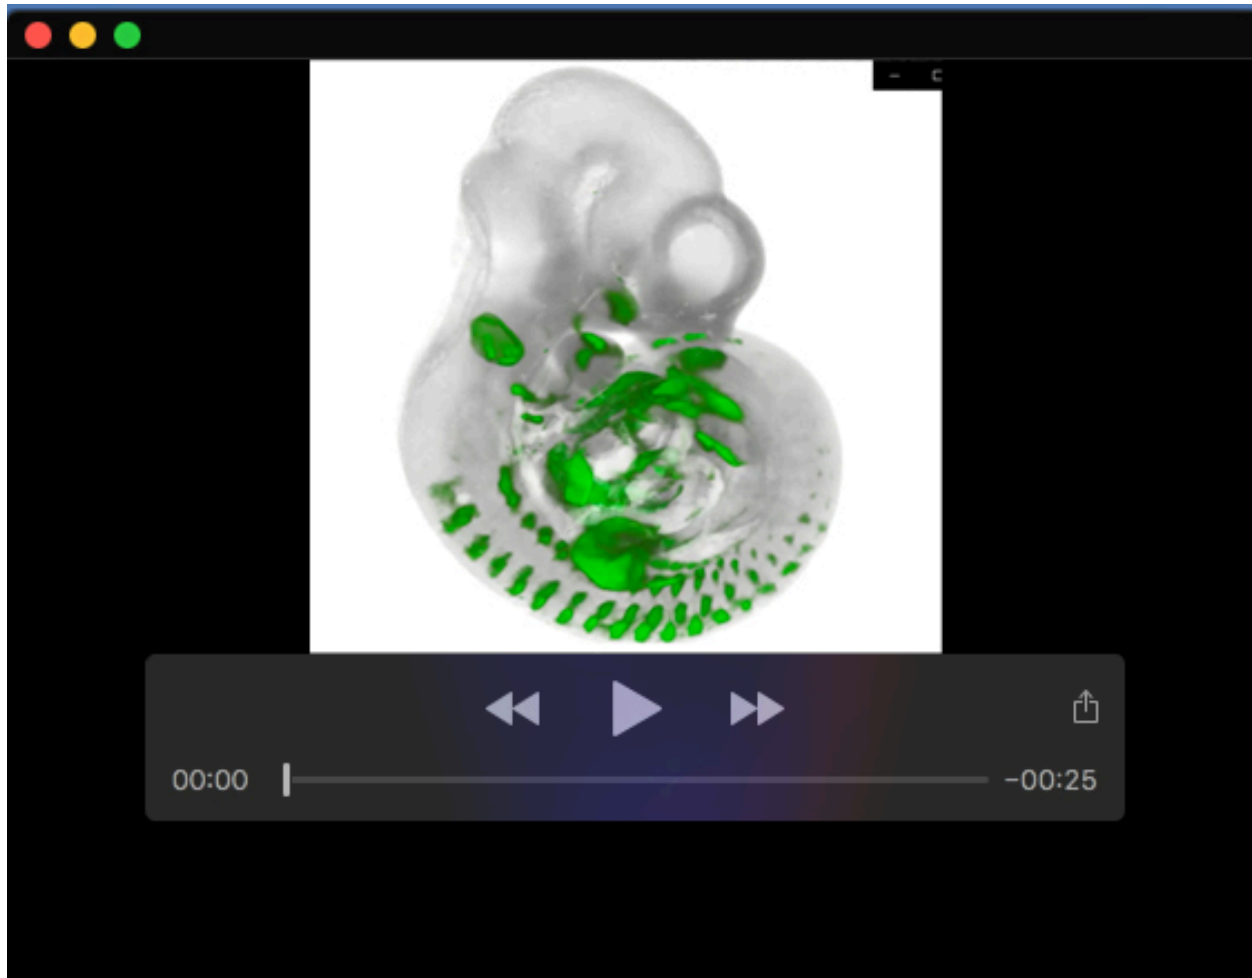

**Movie 3.** 3D movie of Wnt11 expression pattern at E10.5 mapped onto reference embryo

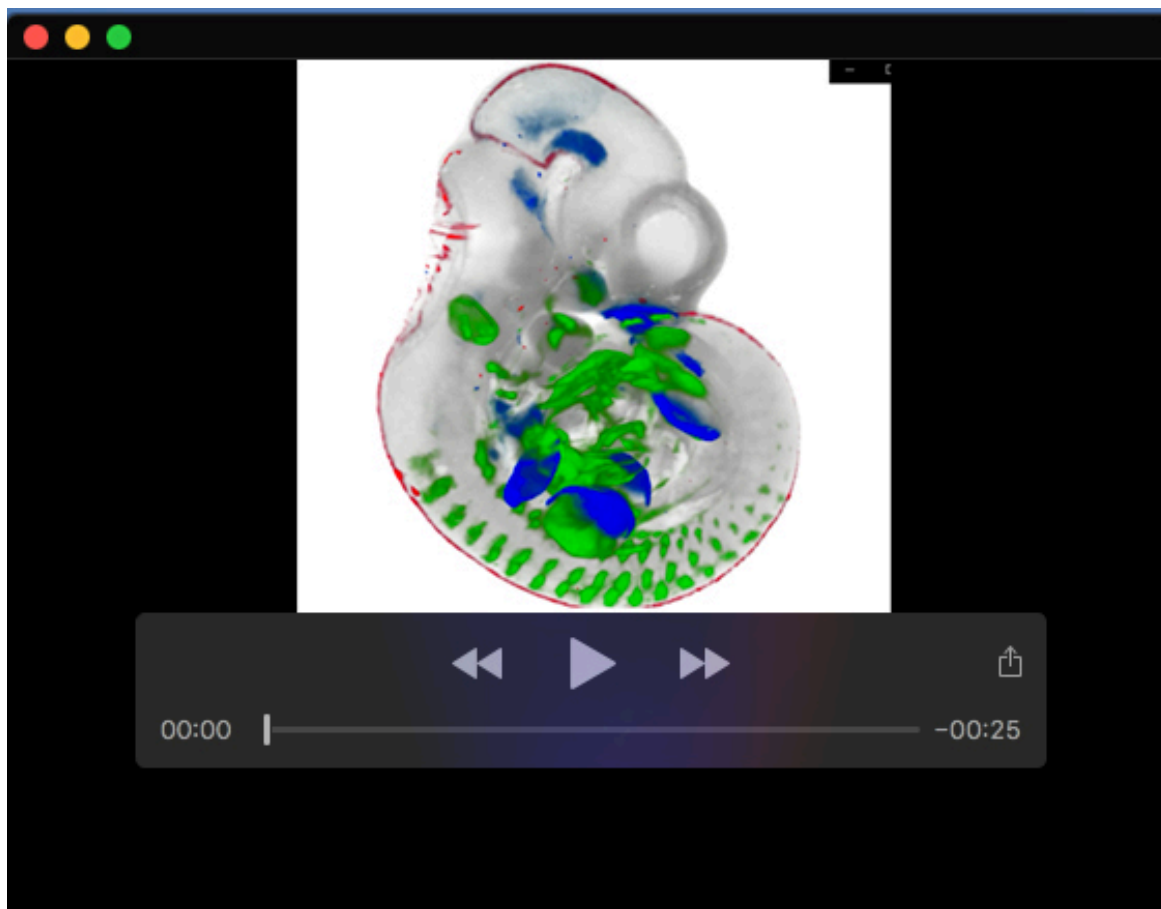

**Movie 4.** 3D movie of integrated Wnt1 (red), Wnt5a (blue) and Wnt11 (green) expression patterns at E10.5 mapped onto reference embryo

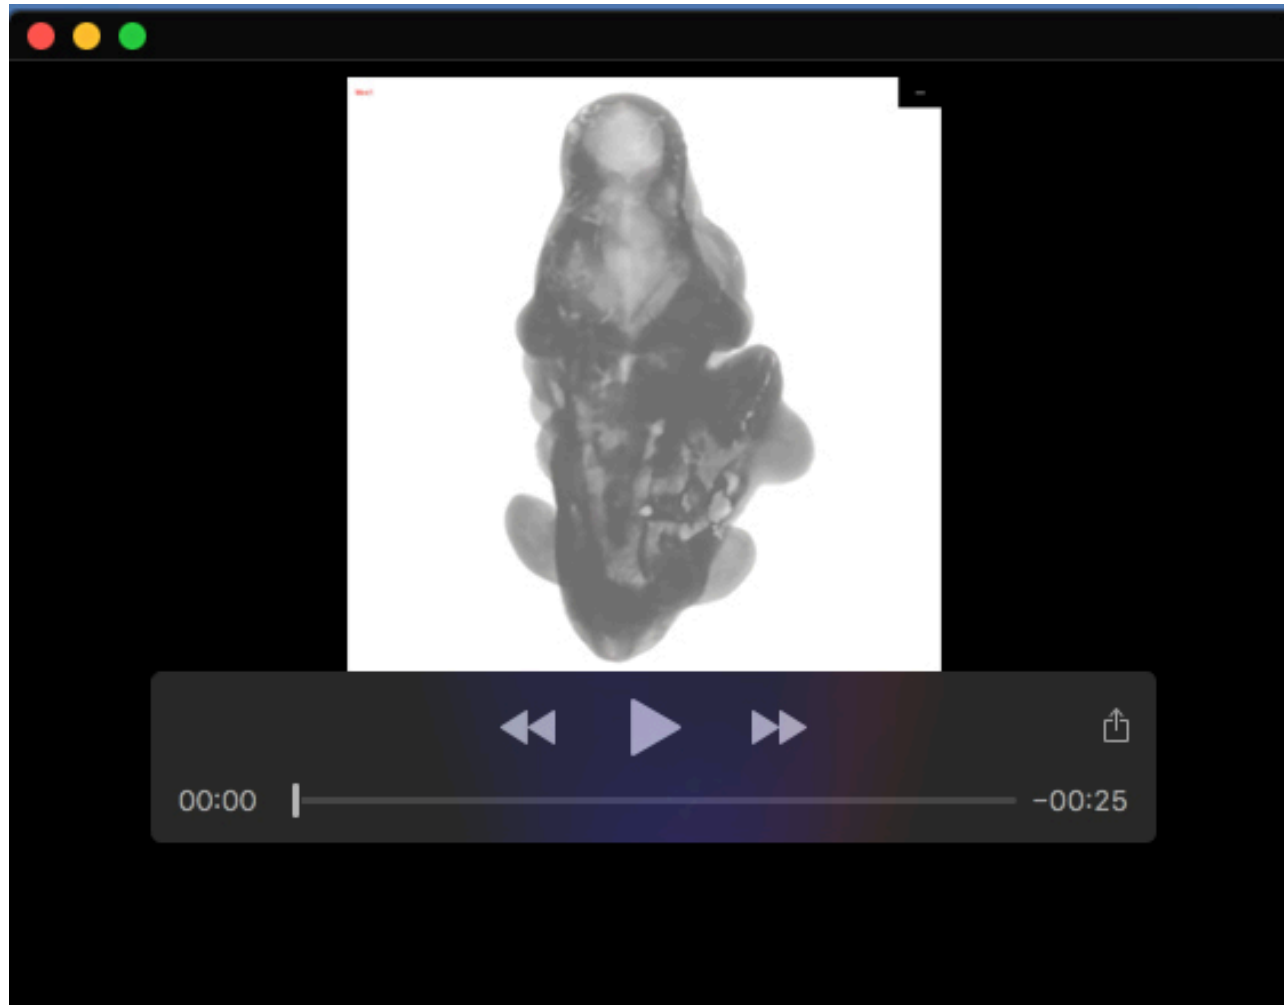

**Movie 5.** 3D movie of integrated expression patterns of all 19 Wnt genes (colour codes indicated on movie) at E10.5 mapped onto reference embryo.
